# Supplementary material for: Pharmacokinetics and Pharmacodynamics of Emicizumab in Persons with Hemophilia A with Factor VIII Inhibitors: HAVEN 1 Study
Source: PubMed Central journal article supplement — Thromb Haemost. 2020 Oct 21;121(3):351–60. doi: 10.1055/s-0040-1717114 (PMC7895541; doi:10.1055/s-0040-1717114), 2020-10-21
Supplement: 10-1055-s-0040-1717114-s200252.pdf [file 10-1055-s-0040-1717114-s200252.pdf]

## Supplemental Methods

### Manufacturers' Kit Insert Information

- aPTT: STA-PIT A; Diagnostica Stago, Cat. #00595
- PT: Neoplastine CI PLUS, Diagnostica Stago, Cat. #00595
- D-dimer: STA D-dimer kit, Diagnostica Stago, package insert REF 00505, dated August 2012
- PF1.2: Enzygnost F 1 + 2 ELISA, Siemens
- Fibrinogen: STA Fibrinogen kit, Diagnostica Stago, package insert REF 00674, dated July 2012
- VWF:Ag: STA von Willebrand Factor kit, Diagnostica Stago, package insert REF 00518, dated July 2011

**Supplementary Table S1** Pharmacokinetic/pharmacodynamic parameter estimates for aPTT

| Parameters                            | Estimate | RSE (%) |
|---------------------------------------|----------|---------|
| $E_0$ (s)                             | 83.8     | 0.55    |
| $IC_{50}$ ( $\mu\text{g}/\text{mL}$ ) | 1.13     | 11.0    |
| $I_{max}$ (s)                         | 61.8     | 0.84    |

Abbreviations: aPTT, activated partial thromboplastin time;  $E_0$ , aPTT at baseline;  $IC_{50}$ , concentration causing half of the maximum effect;  $I_{max}$ , maximum inhibition; RSE, relative standard error.

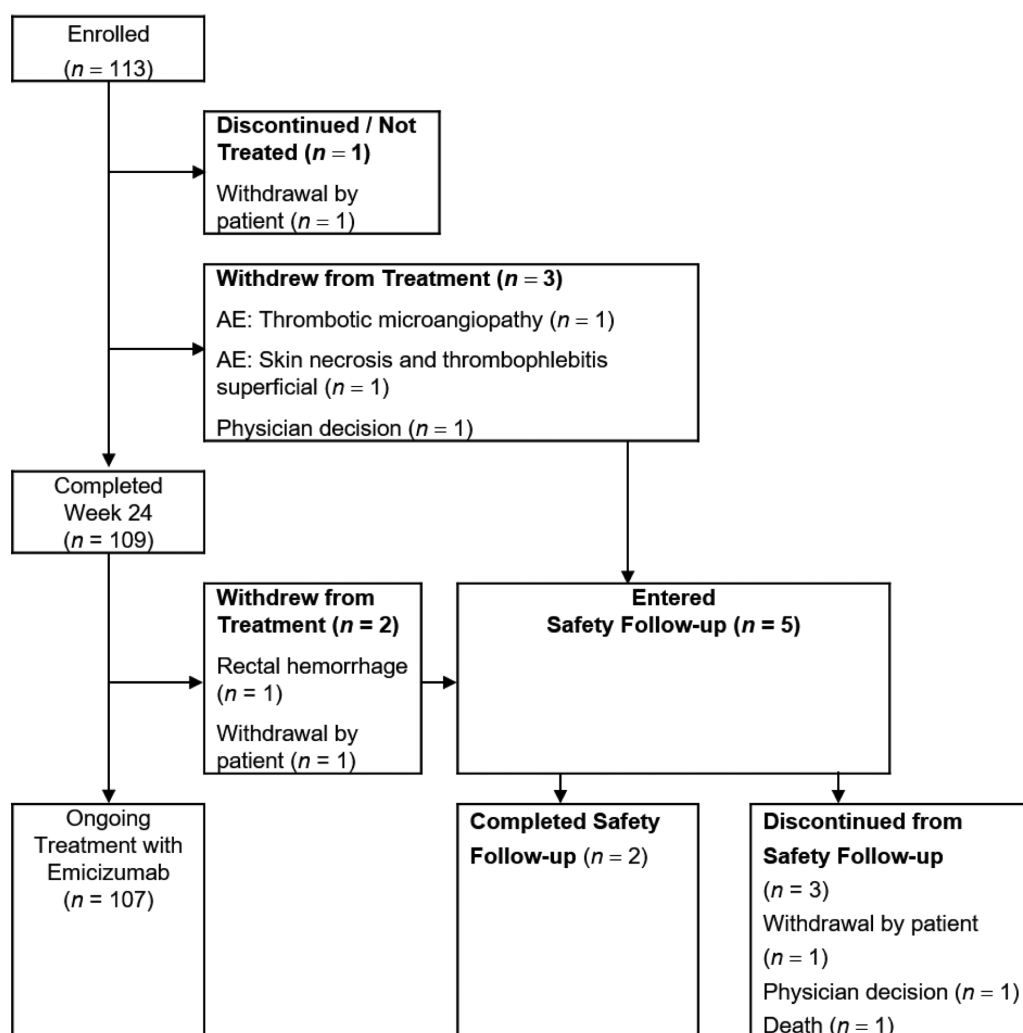

**Supplementary Fig. S1** CONSORT diagram for participants in HAVEN 1. All patients treated with emicizumab were regrouped in one unique arm for the purpose of pharmacokinetic (PK)/pharmacodynamic (PD) analyses. AE, adverse event.

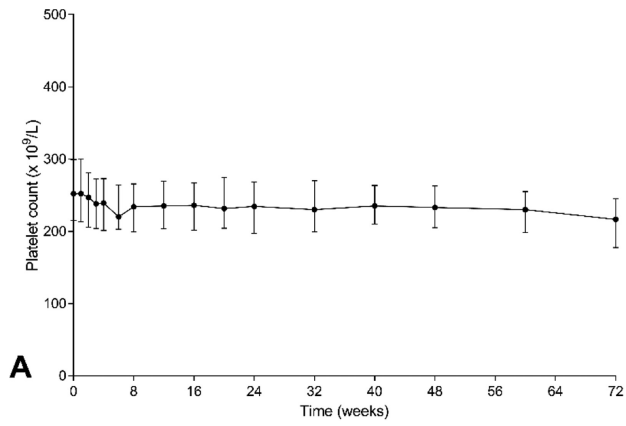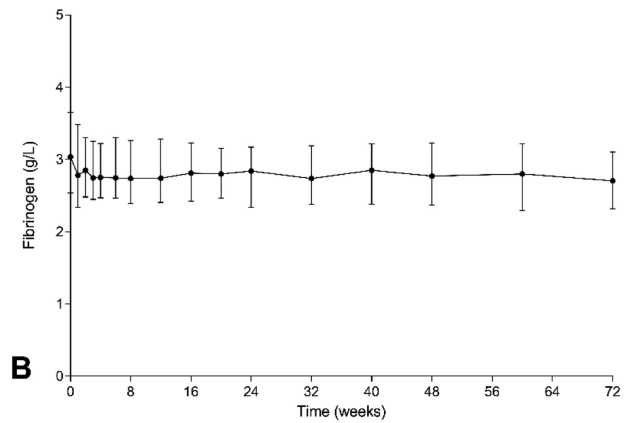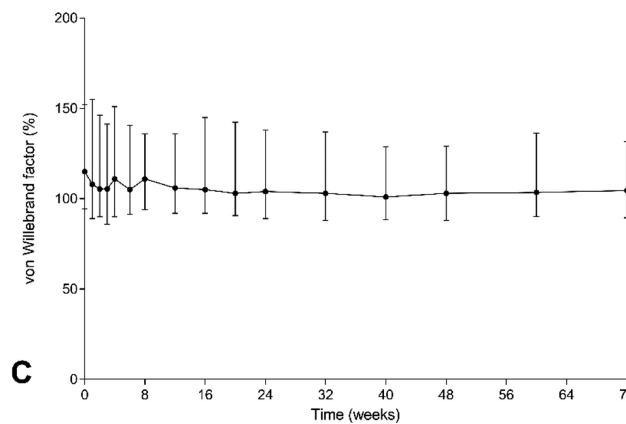

**Supplementary Fig. S2** Safety biomarkers following once weekly dosing with emicizumab. Platelet count (A); fibrinogen (B); von Willebrand factor antigen (C). Median and interquartile ranges shown.

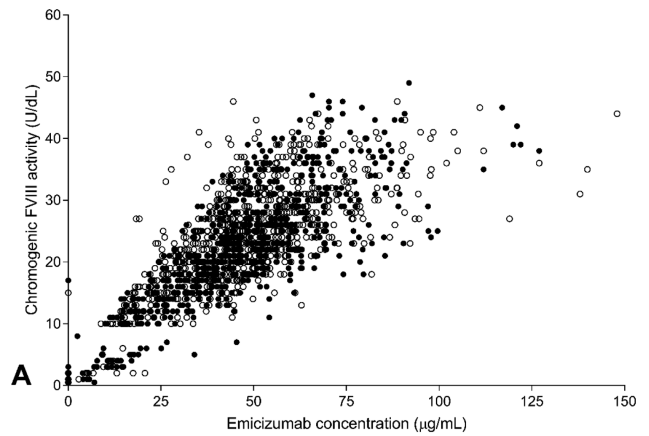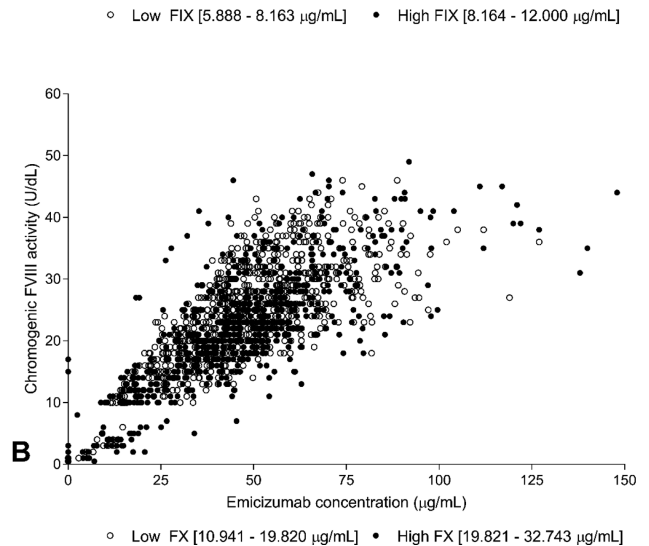

**Supplementary Fig. S3** Pharmacokinetic/pharmacodynamic relationships. Correlation between emicizumab plasma concentrations and chromogenic FVIII-like activity by FIX (A) and FX exposure category (B).

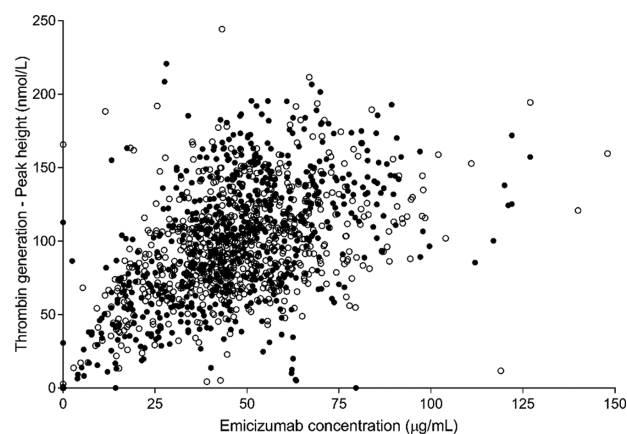

**A** ○ Low FIX [5.888 - 8.163 µg/mL] ● High FIX [8.164 - 12.000 µg/mL]

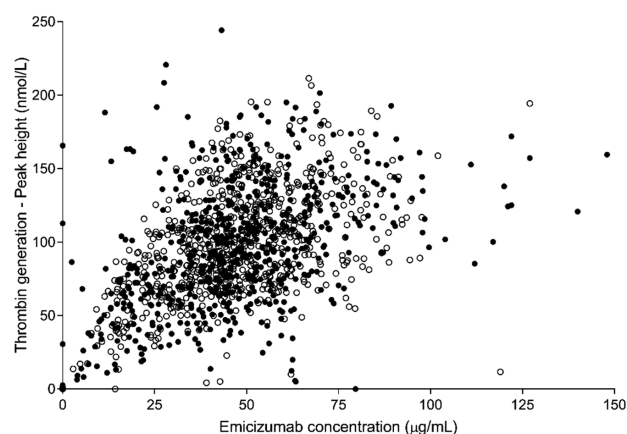

**B** ○ Low FX [10.941 - 19.820 µg/mL] ● High FX [19.821 - 32.743 µg/mL]

**Supplementary Fig. S4** Pharmacokinetic/pharmacodynamic relationships. Correlation between emicizumab plasma concentrations and peak height of thrombin generation by FIX (A) and FX exposure category (B).

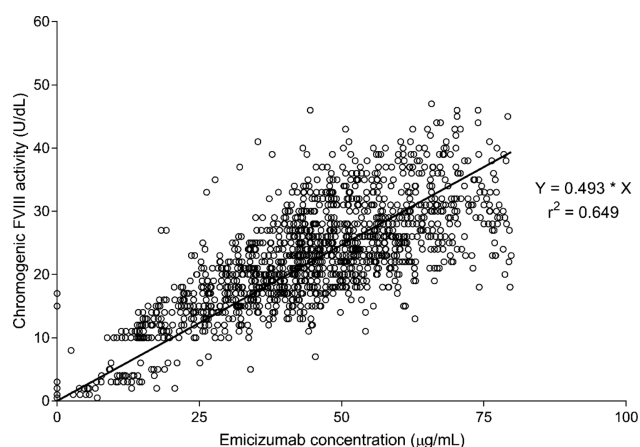

**Supplementary Fig. S5** Pharmacokinetic/pharmacodynamic relationships. Linear regression between emicizumab plasma concentrations and chromogenic FVIII-like activity. Linear regression was performed on the “linear” portion of the  $E_{max}$  model, that is, based on an arbitrary selection on concentrations up to 80 µg/mL.

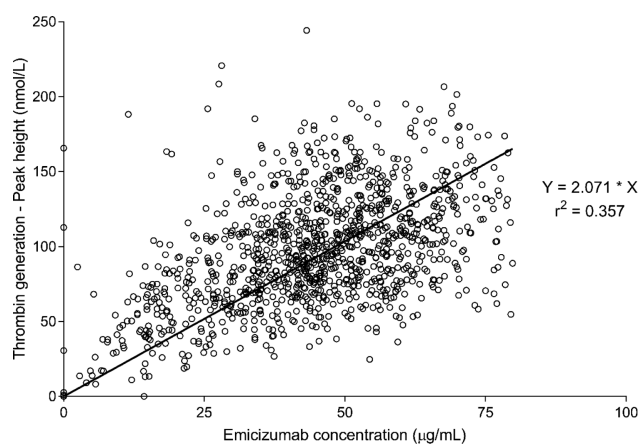

**Supplementary Fig. S6** Pharmacokinetic/pharmacodynamic relationships. Linear regression between emicizumab plasma concentrations and thrombin generation (peak height). Linear regression was performed on the “linear” portion of the  $E_{max}$  model, that is, based on an arbitrary selection on concentrations up to 80 µg/mL.

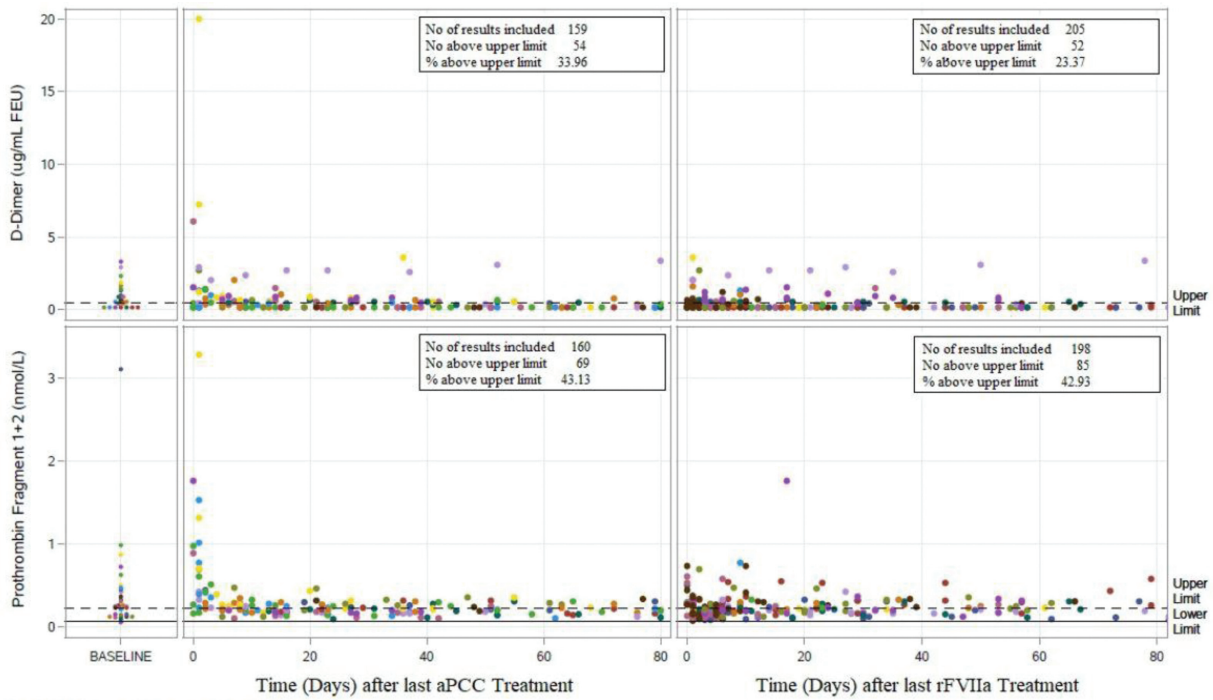

**Supplementary Fig. S7** D-dimer and prothrombin fragment 1 and 2 in function of time after treatment with recombinant activated human FVII (rFVIIa) or activated prothrombin complex concentrate (aPCC) in patients treated with emicizumab prophylaxis.<sup>1</sup> Baseline is the last available result before emicizumab treatment start. All other results are on emicizumab. Only participants with at least one laboratory test performed within 72 hours after rFVIIa or aPCC treatment are included. <sup>1</sup>Callaghan MU, Negrier C, Young G, et al. Use of bypassing agents prior to and post bypassing agent dosing guidance during emicizumab prophylaxis. ASH 2017; poster presentation 3668.
